# Supplementary material for: Less loop diuretic use in patients on sacubitril/valsartan undergoing remote pulmonary artery pressure monitoring
Source: PubMed Central journal article supplement — ESC Heart Fail. 2021 Nov 4;9(1):155–63. doi: 10.1002/ehf2.13665 (PMC8787966; doi:10.1002/ehf2.13665), 2021-11-04
Supplement: EHF2-9-155-s001.pdf [file EHF2-9-155-s001.pdf]

Suppl. Figure 1: Current diuretic dose by Sacubitril / Valsartan users

**A Loop diuretics**

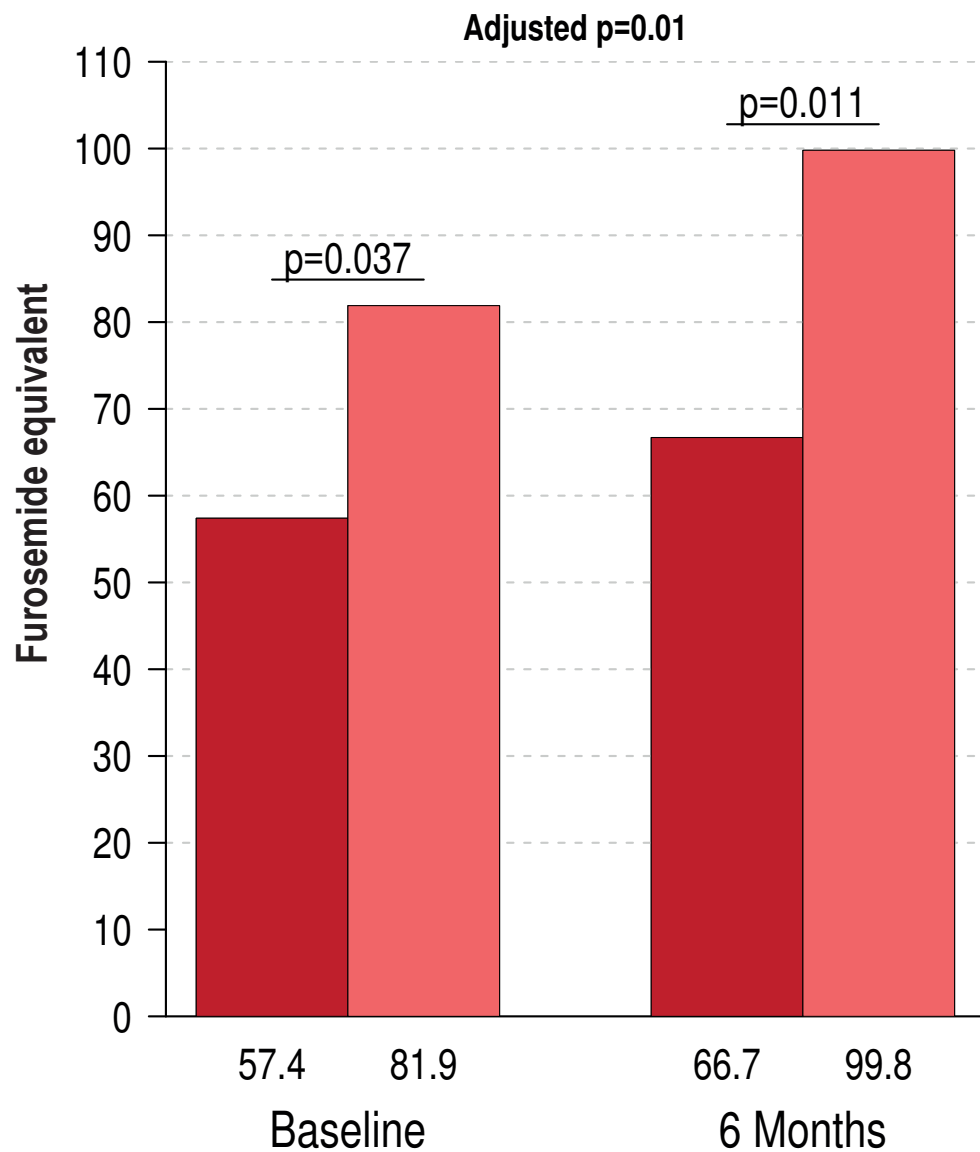

**B Thiazide diuretics**

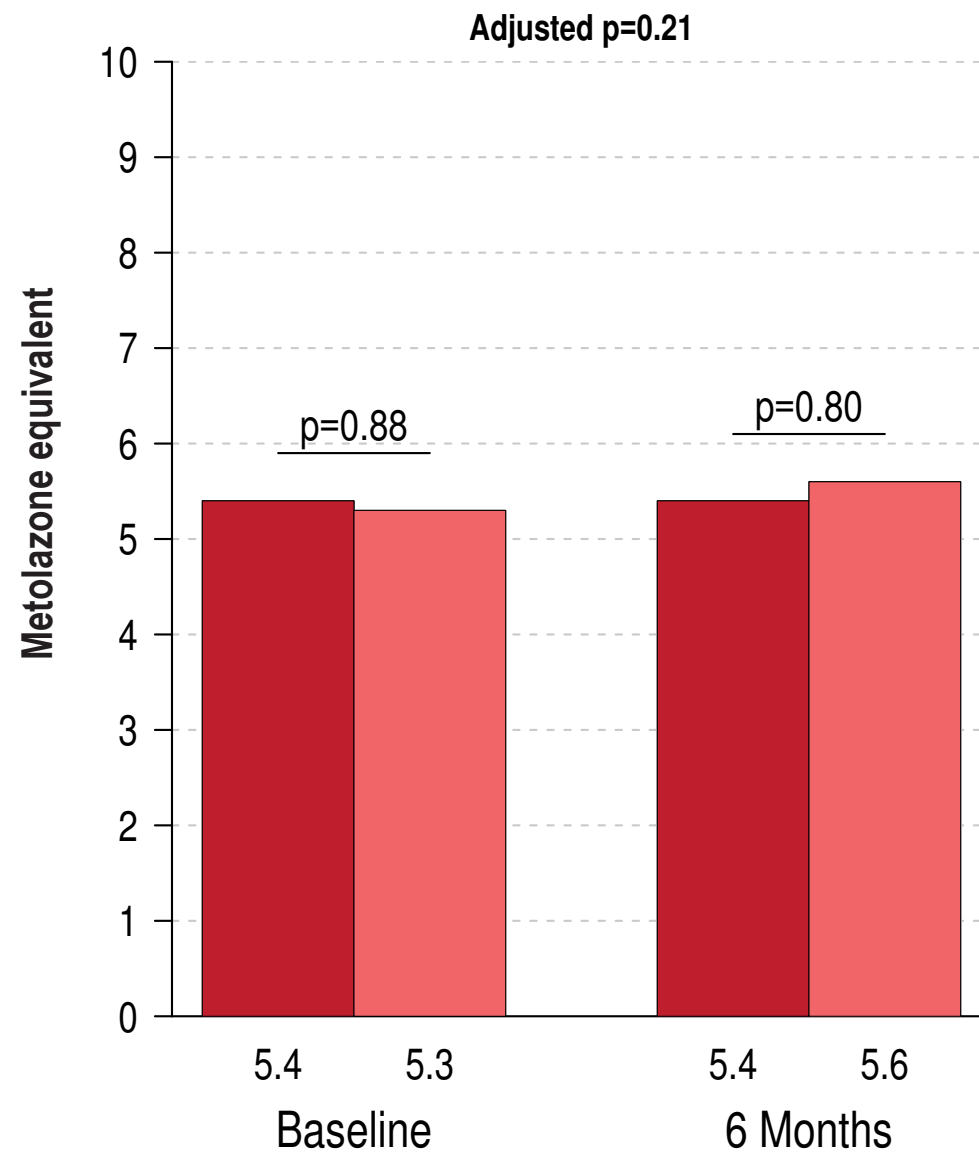

Sacubitril/Valsartan: Yes No
